# Supplementary material for: Copy-Number Alteration Burden Differentially Impacts Immune Profiles and Molecular Features of Hepatocellular Carcinoma
Source: Oxford University Press journal article supplement (doi:10.1158/1078-0432.ccr-20-1497), 2020-09-01
Supplement: 10780432ccr201497-sup-241699_2_supp_6516584_qffnyv.xlsx [file 10780432ccr201497-sup-241699_2_supp_6516584_qffnyv.xlsx]

## Sheet: Discovery Cohort
	Variable	BS Low (n=24)	BS intermediate (n=58)	BS High (n=25)		Variable	low FS (n=27)	FS intermediate (n=53)	high FS (n=27)
	Age (years)					Age (years)
	median (range)	68.50 (53-78)	66 (41 - 83)	63.5 (41-83)		median (range)	65 (54 - 83)	66 (41 - 83)	66 (53 - 80)
	≥65 years, n (%)	17 (71)	34 (59)	11 (44%)		≥65 years, n (%)	17 (63)	29 (55)	16 (59)
	Gender, n (%)					Gender, n (%)
	Males	22 (92)	41 (71)	20 (80)		Males	21 (78)	40 (76)	22 (82)
	Females	2 (8)	17 (29)	5 (20)		Females	6 (22)	13 (24)	5 (18)
	Etiology, n (%) *					Etiology, n (%) *
	Hepatitis B	4 (16.7)	14 (24)	6 (26.1)		Hepatitis B	4 (15)	12 (23)	8 (31)
	Hepatitis C	11 (45.8)	26 (45)	11 (47.8)		Hepatitis C	15 (56)	24 (45)	9 (35)
	Alcohol	6 (25)	6 (10)	2 (8.7)		Alcohol	3 (11)	7 (14)	4 (15)
	NASH	0 (0)	5 (8)	2 (8.7)		NASH	3 (11)	3 (6)	1 (4)
	Other	3 (12.5)	7 (12)	2 (8.7)		Other	2 (7)	6 (11)	4 (15)
	Tumor stage (BCLC), n (%) *					Tumor stage (BCLC), n (%) *
	BCLC 0	0 (0)	8 (14)	4 (16)		BCLC 0	5 (19)	4 (8)	3 (11)
	BCLC A	21 (88)	42 (74)	17 (68)		BCLC A	17 (65)	43 (81)	20 (74)
	BCLC B	2 (8)	4 (7)	2 (8)		BCLC B	2 (8)	5 (9)	1 (4)
	BCLC C	1 (4)	3 (5)	2 (8)		BCLC C	2 (8)	1 (2)	3 (11)
	Child-Pugh score, n (%) *					Child-Pugh score, n (%) *
	A	23 (96)	58 (100)	23 (96)		A	27 (100)	50 (96)	27 (100)
	B	1 (4)	0 (0)	1 (4)		B	0 (0)	2 (4)	0 (0)
	Tumor size (cm), n (%) *					Tumor size (cm), n (%) *
	£ 2 cm	1 (4)	13 (23)	4 (16)		£ 2 cm	5 (19.2)	9 (17)	4 (15)
	>2 - <3 cm	4 (17)	6 (10)	5 (20)		>2 - <3 cm	4 (15.4)	8 (15)	3 (11)
	³ 3 cm	19 (79)	38 (67)	16 (64)		³ 3 cm	17 (65.4)	36 (68)	20 (74)
	Number of nodules, n (%)					Number of nodules, n (%)
	Single nodule	19 (79)	43 (74)	20 (80)		Single nodule	18 (67)	42 (79)	22 (82)
	Multiple nodules	5 (21)	15 (26)	5 (20)		Multiple nodules	9 (33)	11 (21)	5 (18)
	Vascular invasion, n (%) *					Vascular invasion, n (%) *
	Yes	4 (17)	23 (40)	11 (44)		Yes	7 (26)	18 (35)	13 (48)
	No	19 (83)	35 (60)	13 (66)		No	20 (74)	33 (65)	14 (52)
	Tumor satellites, n (%)					Tumor satellites, n (%)
	Yes	7 (29)	12 (21)	7 (28)		Yes	5 (18)	14 (26)	7 (26)
	No	17 (71)	46 (79)	18 (72)		No	22 (82)	39 (74)	20 (74)
	Degree of tumor differentiation, n (%) *					Degree of tumor differentiation, n (%) *
	Well differentiated	5 (24)	6 (14)	2 (10.5)		Well differentiated	5 (23)	8 (19)	0 (0)
	Moderately differentiated	12 (57)	28 (65)	10 (52.6)		Moderately differentiated	13 (59)	29 (69)	8 (42)
	Poorly differentiated	4 (19)	9 (21)	7 (36.8)		Poorly differentiated	4 (18)	5 (12)	11 (58)
	Bilirubin (mg/dl) *					Bilirubin (mg/dl) *
	median (range)	1.0 (0.5 - 2.3)	1.0 (0.3 - 2.0)	0.95 (0.3 – 3.2)		median (range)	0.9 (0.4 - 2.0)	1.15 (0.3 - 3.2)	0.9 (0.3 - 2.3)
	> 1 mg/dl, n (%)	12 (50)	27 (47)	10 (42)		> 1 mg/dl, n (%)	10 (37)	28 (54)	11 (41)
	Albumin (g/l) *					Albumin (g/l) *
	median (range)	4.05 (2.6-5.5)	4.1 (2.5 - 4.8)	4.15 (2.4 - 5.1)		median (range)	4.1 (2.5 - 4.8)	4.15 (2.4 - 5.5)	3.9 (3.2 - 5.1)
	< 3.5 g/l, n (%)	2 (8)	9 (16)	3 (12.5)		< 3.5 g/l, n (%)	4 (15)	6 (12)	4 (15)
	Platelet count *					Platelet count *
	median (range)	147 (55-257)	146.5 (33-370)	168 (71 - 373)		median (range)	168 (42 - 246)	153 (33 - 257)	139 (57 - 373)
	< 100,000/mm3, n (%)	7 (29)	11 (19)	1 (4.2)		< 100,000/mm3, n (%)	5 (19)	10 (19)	4 (15)
	AFP (mg/dl) *					AFP (mg/dl) *
	> 400 mg/dl, n (%)	3 (8)	7 (12)	6 (24)		> 400 mg/dl, n (%)	4 (16)	4 (8)	8 (32)
	*Number of patients <107 for the following: Etiology, 105; BCLC staging, 106; Child-Pugh, 106; Size, 106; Vascular invasion, 105; Degree of differentiation, 83; Bilirubin, 106; Albumin, 106; Platelet count, 106; AFP, 106					*Number of patients <107 for the following: Etiology, 105; BCLC staging, 106; Child-Pugh, 106; Size, 106; Vascular invasion, 105; Degree of differentiation, 83; Bilirubin, 106; Albumin, 106; Platelet count, 106; AFP, 106

## Sheet: Validation Cohort
	Variable	BS Low (n=51)	BS Intermediate (n=136)	BS High (n=158)		Variable	FS Low (n=65)	FS Intermediate (n=111)	FS High (n=169)
	Age (years)					Age (years)
	median (range)	65 (17-80)	64 (16-90)	60 (23-85)		median (range)	62 (16-83)	63 (20-80)	60 (23-90)
	≥65 years, n (%)	27 (53)	64 (47)	55 (35)		≥65 years, n (%)	31 (48)	48 (43)	67 (40)
	Gender, n (%)					Gender, n (%)
	Males	30 (59)	95 (70)	110 (70)		Males	49 (75)	82 (74)	104 (62)
	Females	21 (41)	41 (30)	48 (30)		Females	16 (25)	29 (26)	65 (38)
	Etiology, n (%) *					Etiology, n (%) *
	Hepatitis B	7 (14)	30 (22)	40 (25)		Hepatitis B	10 (15)	23 (21)	44 (26)
	Hepatitis C	2 (4)	16 (12)	12 (7)		Hepatitis C	7 (11)	13 (12)	10 (6)
	Alcohol	15 (29)	42 (31)	53 (33)		Alcohol	25 (38)	39 (35)	46 (27)
	NASH	4 (8)	3 (2)	5 (3)		NASH	3 (5)	5 (5)	4 (2)
	Other	5 (10)	2 (1)	8 (5)		Other	1 (2)	2 (2)	12 (7)
	Tumor stage (AJCC), n (%) *					Tumor stage (AJCC), n (%) *
	T1	29 (56)	75 (55)	65 (41)		T1	38 (58)	56 (50)	75 (44)
	T2	12 (24)	27 (20)	49 (31)		T2	13 (20)	26 (23)	49 (29)
	T3	9 (18)	23 (17)	41 (26)		T3	12 (18)	26 (23)	35 (21)
	T4	1 (2)	8 (6)	3 (2)		T4	2 (3)	2 (2)	8 (5)
	Child-Pugh score, n (%) *					Child-Pugh score, n (%) *
	A	25 (48)	88 (65)	93 (59)		A	38 (58)	76 (68)	92 (54)
	B	5 (10)	11 (8)	5 (3)		B	7 (11)	3 (3)	11 (7)
	C	1 (2)	0 (0)	0 (0)		C	1 (2)	0 (0)	0 (0)
	Vascular invasion, n (%) *					Vascular invasion, n (%) *
	Yes	18 (35)	54 (40)	80 (51)		Yes	21 (32)	49 (44)	82 (49)
	No	33 (65)	82 (60)	78 (49)		No	44 (68)	62 (56)	87 (51)
	Degree of tumor differentiation, n (%) *					Degree of tumor differentiation, n (%) *
	Well differentiated	11 (22)	18 (13)	14 (9)		Well differentiated	11 (17)	15 (14)	17 (10)
	Moderately differentiated	31 (61)	71 (52)	66 (42)		Moderately differentiated	40 (62)	52 (47)	76 (45)
	Poorly differentiated	9 (17)	44 (32)	76 (46)		Poorly differentiated	14 (21)	41 (37)	74 (44)
	Bilirubin (mg/dl) *					Bilirubin (mg/dl) *
	median (range)	0.7 (0.3-3.7)	0.6 (0.1-13)	0.7 (0.2-19)		median (range)	0.65 (0.3-13)	0.7 (0.2-9)	0.7 (0.1-19)
	> 1 mg/dl, n (%)	10 (20)	25 (18)	27 (17)		> 1 mg/dl, n (%)	12 (18)	25 (23)	25 (15)
	Albumin (g/l) *					Albumin (g/l) *
	median (range)	3.7 (0.2-6)	4 (0.3-48)	4.1 (0.3-5200)		median (range)	3.85 (0.2-40)	4 (0.3-48)	4.1 (0.4-5200)
	< 3.5 g/l, n (%)	17 (33)	29 (21)	23 (15)		< 3.5 g/l, n (%)	20 (31)	21 (19)	28 (17)
	Platelet count *					Platelet count *
	median (range)	216 (4-450)	211 (69-499)	207 (75-287)		median (range)	193 (4-333)	197 (75-287)	218 (69-499)
	< 100,000/mm3, n (%)	4 (8)	7 (5)	5 (3)		< 100,000/mm3, n (%)	4 (6)	7 (6)	5 (3)
	AFP (mg/dl) *					AFP (mg/dl) *
	median (range)	5.5 (1-2035400)	13.5 (1-94340)	33 (1-308836)		median (range)	6.5 (1-94340)	11 (1-308836)	25 (1-2035400)
	> 400 mg/dl, n (%)	4 (8)	21 (15)	38 (24)		> 400 mg/dl, n (%)	8 (12)	22 (20)	33 (20)
	*Number of patients <345 for the following: Etiology, 244; Tumor stage, 342; Child-Pugh score, 228; Degree of differentiation, 340; Bilirubin, 285; Albumin, 281; Platelet count, 286; AFP, 262					*Number of patients <345 for the following: Etiology, 244; Tumor stage, 342; Child-Pugh score, 228; Degree of differentiation, 340; Bilirubin, 285; Albumin, 281; Platelet count, 286; AFP, 262
